# Supplementary material
Source: publisher figshare collection journal article supplement (https://acs.figshare.com/ndownloader/files/4298497)
Supplement: Supplementary file 1 [file 4298497]

data_110415a_0m

 

_audit_creation_method            SHELXL-97

_chemical_name_systematic

;

 ?

;

_chemical_name_common             ?

_chemical_melting_point           ?

_chemical_formula_moiety          ?

_chemical_formula_sum

 'C25 H19 Cl2 N O'

_chemical_formula_weight          420.31

 

loop_

 _atom_type_symbol

 _atom_type_description

 _atom_type_scat_dispersion_real

 _atom_type_scat_dispersion_imag

 _atom_type_scat_source

 'C'  'C'   0.0033   0.0016

 'International Tables Vol C Tables 4.2.6.8 and 6.1.1.4'

 'H'  'H'   0.0000   0.0000

 'International Tables Vol C Tables 4.2.6.8 and 6.1.1.4'

 'N'  'N'   0.0061   0.0033

 'International Tables Vol C Tables 4.2.6.8 and 6.1.1.4'

 'O'  'O'   0.0106   0.0060

 'International Tables Vol C Tables 4.2.6.8 and 6.1.1.4'

 'Cl'  'Cl'   0.1484   0.1585

 'International Tables Vol C Tables 4.2.6.8 and 6.1.1.4'

 

_symmetry_cell_setting            Triclinic

_symmetry_space_group_name_H-M    P-1

 

loop_

 _symmetry_equiv_pos_as_xyz

 'x, y, z'

 '-x, -y, -z'

 

_cell_length_a                    9.5724(13)

_cell_length_b                    10.2383(15)

_cell_length_c                    11.9176(16)

_cell_angle_alpha                 101.788(2)

_cell_angle_beta                  113.095(2)

_cell_angle_gamma                 99.135(2)

_cell_volume                      1014.0(2)

_cell_formula_units_Z             2

_cell_measurement_temperature     150(2)

_cell_measurement_reflns_used     1140

_cell_measurement_theta_min       2.40

_cell_measurement_theta_max       24.80

 

_exptl_crystal_description        Block

_exptl_crystal_colour             Colorless

_exptl_crystal_size_max           0.32

_exptl_crystal_size_mid           0.24

_exptl_crystal_size_min           0.15

_exptl_crystal_density_meas       ?

_exptl_crystal_density_diffrn     1.377

_exptl_crystal_density_method     'not measured'

_exptl_crystal_F_000              436

_exptl_absorpt_coefficient_mu     0.337

_exptl_absorpt_correction_type    Multi-scan

_exptl_absorpt_correction_T_min   0.8999

_exptl_absorpt_correction_T_max   0.9512

_exptl_absorpt_process_details    SADABS

 

_exptl_special_details

;

 ?

;

 

_diffrn_ambient_temperature       150(2)

_diffrn_radiation_wavelength      0.71073

_diffrn_radiation_type            MoK\a

_diffrn_radiation_source          'fine-focus sealed tube'

_diffrn_radiation_monochromator   graphite

_diffrn_measurement_device_type   'CCD area detector'

_diffrn_measurement_method        'phi and omega scans'

_diffrn_detector_area_resol_mean  ?

_diffrn_standards_number          ?

_diffrn_standards_interval_count  ?

_diffrn_standards_interval_time   ?

_diffrn_standards_decay_%         ?

_diffrn_reflns_number             5242

_diffrn_reflns_av_R_equivalents   0.0287

_diffrn_reflns_av_sigmaI/netI     0.0579

_diffrn_reflns_limit_h_min        -10

_diffrn_reflns_limit_h_max        11

_diffrn_reflns_limit_k_min        -11

_diffrn_reflns_limit_k_max        12

_diffrn_reflns_limit_l_min        -14

_diffrn_reflns_limit_l_max        8

_diffrn_reflns_theta_min          1.94

_diffrn_reflns_theta_max          25.25

_reflns_number_total              3654

_reflns_number_gt                 2777

_reflns_threshold_expression      >2sigma(I)

 

_computing_data_collection        'Bruker SMART'

_computing_cell_refinement        'Bruker SMART'

_computing_data_reduction         'Bruker SAINT'

_computing_structure_solution     'SHELXS-97 (Sheldrick, 1990)'

_computing_structure_refinement   'SHELXL-97 (Sheldrick, 1997)'

_computing_molecular_graphics     'Bruker SHELXTL'

_computing_publication_material   'Bruker SHELXTL'

 

_refine_special_details

;

 Refinement of F^2^ against ALL reflections.  The weighted R-factor wR and

 goodness of fit S are based on F^2^, conventional R-factors R are based

 on F, with F set to zero for negative F^2^. The threshold expression of

 F^2^ > 2sigma(F^2^) is used only for calculating R-factors(gt) etc. and is

 not relevant to the choice of reflections for refinement.  R-factors based

 on F^2^ are statistically about twice as large as those based on F, and R-

 factors based on ALL data will be even larger.

;

 

_refine_ls_structure_factor_coef  Fsqd

_refine_ls_matrix_type            full

_refine_ls_weighting_scheme       calc

_refine_ls_weighting_details

 'calc w=1/[\s^2^(Fo^2^)+(0.0437P)^2^+0.1866P] where P=(Fo^2^+2Fc^2^)/3'

_atom_sites_solution_primary      direct

_atom_sites_solution_secondary    difmap

_atom_sites_solution_hydrogens    geom

_refine_ls_hydrogen_treatment     constr

_refine_ls_extinction_method      none

_refine_ls_extinction_coef        ?

_refine_ls_number_reflns          3654

_refine_ls_number_parameters      264

_refine_ls_number_restraints      0

_refine_ls_R_factor_all           0.0639

_refine_ls_R_factor_gt            0.0460

_refine_ls_wR_factor_ref          0.1101

_refine_ls_wR_factor_gt           0.1009

_refine_ls_goodness_of_fit_ref    1.046

_refine_ls_restrained_S_all       1.046

_refine_ls_shift/su_max           0.001

_refine_ls_shift/su_mean          0.000

 

loop_

 _atom_site_label

 _atom_site_type_symbol

 _atom_site_fract_x

 _atom_site_fract_y

 _atom_site_fract_z

 _atom_site_U_iso_or_equiv

 _atom_site_adp_type

 _atom_site_occupancy

 _atom_site_symmetry_multiplicity

 _atom_site_calc_flag

 _atom_site_refinement_flags

 _atom_site_disorder_assembly

 _atom_site_disorder_group

C1 C 1.3607(3) 0.9973(2) 1.2880(2) 0.0221(5) Uani 1 1 d . . .

C2 C 1.3080(3) 1.0061(2) 1.3813(2) 0.0238(6) Uani 1 1 d . . .

H2 H 1.3739 1.0643 1.4656 0.029 Uiso 1 1 calc R . .

C3 C 1.1572(3) 0.9288(2) 1.3506(2) 0.0227(6) Uani 1 1 d . . .

H3 H 1.1199 0.9334 1.4140 0.027 Uiso 1 1 calc R . .

C4 C 1.0631(3) 0.8459(2) 1.2275(2) 0.0208(5) Uani 1 1 d . . .

C5 C 1.1200(3) 0.8349(2) 1.1341(2) 0.0214(5) Uani 1 1 d . . .

C6 C 1.2694(3) 0.9112(2) 1.1638(2) 0.0210(5) Uani 1 1 d . . .

H6 H 1.3084 0.9050 1.1014 0.025 Uiso 1 1 calc R . .

C7 C 0.9948(3) 0.7417(2) 1.0098(2) 0.0200(5) Uani 1 1 d . . .

C8 C 1.0071(3) 0.7215(2) 0.8878(2) 0.0204(5) Uani 1 1 d . . .

C9 C 1.1274(3) 0.6714(3) 0.8725(2) 0.0262(6) Uani 1 1 d . . .

H9 H 1.2010 0.6478 0.9409 0.031 Uiso 1 1 calc R . .

C10 C 1.1424(3) 0.6552(3) 0.7599(2) 0.0289(6) Uani 1 1 d . . .

H10 H 1.2245 0.6201 0.7505 0.035 Uiso 1 1 calc R . .

C11 C 1.0357(3) 0.6911(3) 0.6613(2) 0.0246(6) Uani 1 1 d . . .

C12 C 0.9148(3) 0.7408(3) 0.6728(2) 0.0250(6) Uani 1 1 d . . .

H12 H 0.8419 0.7645 0.6042 0.030 Uiso 1 1 calc R . .

C13 C 0.9012(3) 0.7556(2) 0.7859(2) 0.0227(6) Uani 1 1 d . . .

H13 H 0.8179 0.7896 0.7942 0.027 Uiso 1 1 calc R . .

C14 C 0.8714(3) 0.6964(2) 1.0328(2) 0.0196(5) Uani 1 1 d . . .

C15 C 0.6273(3) 0.6832(2) 1.0266(2) 0.0221(5) Uani 1 1 d . . .

C16 C 0.7478(3) 0.7907(2) 1.1532(2) 0.0229(6) Uani 1 1 d . . .

C17 C 0.7015(3) 0.7825(3) 1.2607(2) 0.0317(6) Uani 1 1 d . . .

H17A H 0.5967 0.7980 1.2383 0.048 Uiso 1 1 calc R . .

H17B H 0.7783 0.8533 1.3395 0.048 Uiso 1 1 calc R . .

H17C H 0.6996 0.6907 1.2733 0.048 Uiso 1 1 calc R . .

C18 C 0.7535(3) 0.9333(3) 1.1300(3) 0.0302(6) Uani 1 1 d . . .

H18A H 0.7873 0.9363 1.0627 0.045 Uiso 1 1 calc R . .

H18B H 0.8282 1.0053 1.2089 0.045 Uiso 1 1 calc R . .

H18C H 0.6485 0.9492 1.1038 0.045 Uiso 1 1 calc R . .

C19 C 0.9006(3) 0.7483(2) 1.1684(2) 0.0210(5) Uani 1 1 d . . .

H19 H 0.9055 0.6694 1.2061 0.025 Uiso 1 1 calc R . .

C20 C 0.6390(3) 0.5470(2) 0.8311(2) 0.0211(5) Uani 1 1 d . . .

C21 C 0.5059(3) 0.5665(2) 0.7400(2) 0.0236(6) Uani 1 1 d . . .

H21 H 0.4625 0.6393 0.7623 0.028 Uiso 1 1 calc R . .

C22 C 0.4370(3) 0.4797(3) 0.6169(2) 0.0268(6) Uani 1 1 d . . .

H22 H 0.3441 0.4910 0.5548 0.032 Uiso 1 1 calc R . .

C23 C 0.5025(3) 0.3762(3) 0.5833(2) 0.0273(6) Uani 1 1 d . . .

H23 H 0.4549 0.3168 0.4983 0.033 Uiso 1 1 calc R . .

C24 C 0.6376(3) 0.3591(3) 0.6736(2) 0.0266(6) Uani 1 1 d . . .

H24 H 0.6839 0.2893 0.6501 0.032 Uiso 1 1 calc R . .

C25 C 0.7051(3) 0.4435(2) 0.7980(2) 0.0239(6) Uani 1 1 d . . .

H25 H 0.7964 0.4306 0.8604 0.029 Uiso 1 1 calc R . .

Cl1 Cl 1.54790(7) 1.09790(6) 1.32750(6) 0.02980(19) Uani 1 1 d . . .

Cl2 Cl 1.05890(8) 0.67957(8) 0.52173(6) 0.0386(2) Uani 1 1 d . . .

N1 N 0.7103(2) 0.6360(2) 0.95890(19) 0.0220(5) Uani 1 1 d . . .

O1 O 0.48611(19) 0.65019(18) 0.98742(17) 0.0300(4) Uani 1 1 d . . .

 

loop_

 _atom_site_aniso_label

 _atom_site_aniso_U_11

 _atom_site_aniso_U_22

 _atom_site_aniso_U_33

 _atom_site_aniso_U_23

 _atom_site_aniso_U_13

 _atom_site_aniso_U_12

C1 0.0174(13) 0.0186(13) 0.0272(14) 0.0073(11) 0.0064(11) 0.0050(10)

C2 0.0218(13) 0.0213(13) 0.0222(14) 0.0037(11) 0.0043(11) 0.0075(11)

C3 0.0256(14) 0.0247(13) 0.0219(14) 0.0068(11) 0.0130(11) 0.0105(11)

C4 0.0193(13) 0.0198(13) 0.0258(14) 0.0091(11) 0.0101(11) 0.0080(10)

C5 0.0207(13) 0.0225(13) 0.0230(13) 0.0093(11) 0.0082(11) 0.0111(11)

C6 0.0180(13) 0.0243(13) 0.0223(13) 0.0084(11) 0.0085(11) 0.0082(10)

C7 0.0166(12) 0.0201(13) 0.0222(13) 0.0052(10) 0.0072(10) 0.0064(10)

C8 0.0182(13) 0.0206(13) 0.0188(13) 0.0027(10) 0.0066(10) 0.0044(10)

C9 0.0198(13) 0.0357(15) 0.0251(14) 0.0107(12) 0.0092(11) 0.0116(11)

C10 0.0229(14) 0.0368(16) 0.0301(15) 0.0078(12) 0.0144(12) 0.0118(12)

C11 0.0266(14) 0.0237(13) 0.0224(14) 0.0037(11) 0.0129(12) 0.0021(11)

C12 0.0229(14) 0.0258(14) 0.0214(14) 0.0075(11) 0.0050(11) 0.0052(11)

C13 0.0197(13) 0.0229(13) 0.0250(14) 0.0058(11) 0.0085(11) 0.0093(10)

C14 0.0195(13) 0.0165(12) 0.0210(13) 0.0034(10) 0.0072(11) 0.0071(10)

C15 0.0219(14) 0.0192(13) 0.0271(14) 0.0076(11) 0.0121(11) 0.0061(10)

C16 0.0211(13) 0.0219(13) 0.0272(14) 0.0056(11) 0.0126(11) 0.0068(11)

C17 0.0304(15) 0.0356(16) 0.0319(16) 0.0065(12) 0.0195(13) 0.0048(12)

C18 0.0302(15) 0.0247(14) 0.0383(16) 0.0073(12) 0.0175(13) 0.0102(12)

C19 0.0205(13) 0.0210(13) 0.0242(14) 0.0068(10) 0.0120(11) 0.0066(10)

C20 0.0197(13) 0.0183(12) 0.0228(14) 0.0037(10) 0.0094(11) 0.0012(10)

C21 0.0192(13) 0.0206(13) 0.0314(15) 0.0067(11) 0.0120(11) 0.0049(10)

C22 0.0225(14) 0.0309(15) 0.0261(15) 0.0123(12) 0.0087(12) 0.0047(11)

C23 0.0280(15) 0.0257(14) 0.0248(14) 0.0056(11) 0.0118(12) -0.0002(11)

C24 0.0290(15) 0.0216(13) 0.0295(15) 0.0047(11) 0.0144(12) 0.0074(11)

C25 0.0206(13) 0.0229(13) 0.0295(15) 0.0095(11) 0.0110(11) 0.0072(11)

Cl1 0.0212(3) 0.0272(4) 0.0337(4) 0.0054(3) 0.0084(3) 0.0015(3)

Cl2 0.0450(4) 0.0455(4) 0.0289(4) 0.0108(3) 0.0219(3) 0.0069(3)

N1 0.0167(11) 0.0234(11) 0.0235(11) 0.0021(9) 0.0087(9) 0.0054(9)

O1 0.0190(10) 0.0354(11) 0.0335(11) 0.0054(8) 0.0123(8) 0.0058(8)

 

_geom_special_details

;

 All esds (except the esd in the dihedral angle between two l.s. planes)

 are estimated using the full covariance matrix.  The cell esds are taken

 into account individually in the estimation of esds in distances, angles

 and torsion angles; correlations between esds in cell parameters are only

 used when they are defined by crystal symmetry.  An approximate (isotropic)

 treatment of cell esds is used for estimating esds involving l.s. planes.

;

 

loop_

 _geom_bond_atom_site_label_1

 _geom_bond_atom_site_label_2

 _geom_bond_distance

 _geom_bond_site_symmetry_2

 _geom_bond_publ_flag

C1 C2 1.383(3) . ?

C1 C6 1.392(3) . ?

C1 Cl1 1.746(2) . ?

C2 C3 1.396(3) . ?

C2 H2 0.9500 . ?

C3 C4 1.377(3) . ?

C3 H3 0.9500 . ?

C4 C5 1.413(3) . ?

C4 C19 1.508(3) . ?

C5 C6 1.384(3) . ?

C5 C7 1.486(3) . ?

C6 H6 0.9500 . ?

C7 C14 1.348(3) . ?

C7 C8 1.479(3) . ?

C8 C9 1.392(3) . ?

C8 C13 1.395(3) . ?

C9 C10 1.385(3) . ?

C9 H9 0.9500 . ?

C10 C11 1.383(4) . ?

C10 H10 0.9500 . ?

C11 C12 1.379(3) . ?

C11 Cl2 1.745(3) . ?

C12 C13 1.384(3) . ?

C12 H12 0.9500 . ?

C13 H13 0.9500 . ?

C14 N1 1.395(3) . ?

C14 C19 1.490(3) . ?

C15 O1 1.206(3) . ?

C15 N1 1.408(3) . ?

C15 C16 1.540(3) . ?

C16 C17 1.524(3) . ?

C16 C18 1.536(3) . ?

C16 C19 1.545(3) . ?

C17 H17A 0.9800 . ?

C17 H17B 0.9800 . ?

C17 H17C 0.9800 . ?

C18 H18A 0.9800 . ?

C18 H18B 0.9800 . ?

C18 H18C 0.9800 . ?

C19 H19 1.0000 . ?

C20 C25 1.384(3) . ?

C20 C21 1.389(3) . ?

C20 N1 1.426(3) . ?

C21 C22 1.378(3) . ?

C21 H21 0.9500 . ?

C22 C23 1.382(4) . ?

C22 H22 0.9500 . ?

C23 C24 1.385(3) . ?

C23 H23 0.9500 . ?

C24 C25 1.381(3) . ?

C24 H24 0.9500 . ?

C25 H25 0.9500 . ?

 

loop_

 _geom_angle_atom_site_label_1

 _geom_angle_atom_site_label_2

 _geom_angle_atom_site_label_3

 _geom_angle

 _geom_angle_site_symmetry_1

 _geom_angle_site_symmetry_3

 _geom_angle_publ_flag

C2 C1 C6 122.2(2) . . ?

C2 C1 Cl1 118.79(18) . . ?

C6 C1 Cl1 119.02(19) . . ?

C1 C2 C3 119.6(2) . . ?

C1 C2 H2 120.2 . . ?

C3 C2 H2 120.2 . . ?

C4 C3 C2 119.3(2) . . ?

C4 C3 H3 120.4 . . ?

C2 C3 H3 120.4 . . ?

C3 C4 C5 120.6(2) . . ?

C3 C4 C19 131.1(2) . . ?

C5 C4 C19 108.2(2) . . ?

C6 C5 C4 120.4(2) . . ?

C6 C5 C7 129.8(2) . . ?

C4 C5 C7 109.7(2) . . ?

C5 C6 C1 117.9(2) . . ?

C5 C6 H6 121.0 . . ?

C1 C6 H6 121.0 . . ?

C14 C7 C8 130.1(2) . . ?

C14 C7 C5 105.7(2) . . ?

C8 C7 C5 123.9(2) . . ?

C9 C8 C13 118.0(2) . . ?

C9 C8 C7 121.0(2) . . ?

C13 C8 C7 121.1(2) . . ?

C10 C9 C8 121.5(2) . . ?

C10 C9 H9 119.3 . . ?

C8 C9 H9 119.3 . . ?

C11 C10 C9 118.9(2) . . ?

C11 C10 H10 120.6 . . ?

C9 C10 H10 120.6 . . ?

C12 C11 C10 121.3(2) . . ?

C12 C11 Cl2 119.3(2) . . ?

C10 C11 Cl2 119.42(19) . . ?

C11 C12 C13 119.1(2) . . ?

C11 C12 H12 120.5 . . ?

C13 C12 H12 120.5 . . ?

C12 C13 C8 121.4(2) . . ?

C12 C13 H13 119.3 . . ?

C8 C13 H13 119.3 . . ?

C7 C14 N1 135.7(2) . . ?

C7 C14 C19 114.4(2) . . ?

N1 C14 C19 108.26(19) . . ?

O1 C15 N1 125.2(2) . . ?

O1 C15 C16 127.0(2) . . ?

N1 C15 C16 107.66(19) . . ?

C17 C16 C18 111.5(2) . . ?

C17 C16 C15 111.0(2) . . ?

C18 C16 C15 106.8(2) . . ?

C17 C16 C19 114.5(2) . . ?

C18 C16 C19 111.3(2) . . ?

C15 C16 C19 100.94(18) . . ?

C16 C17 H17A 109.5 . . ?

C16 C17 H17B 109.5 . . ?

H17A C17 H17B 109.5 . . ?

C16 C17 H17C 109.5 . . ?

H17A C17 H17C 109.5 . . ?

H17B C17 H17C 109.5 . . ?

C16 C18 H18A 109.5 . . ?

C16 C18 H18B 109.5 . . ?

H18A C18 H18B 109.5 . . ?

C16 C18 H18C 109.5 . . ?

H18A C18 H18C 109.5 . . ?

H18B C18 H18C 109.5 . . ?

C14 C19 C4 101.80(19) . . ?

C14 C19 C16 101.45(19) . . ?

C4 C19 C16 125.6(2) . . ?

C14 C19 H19 108.9 . . ?

C4 C19 H19 108.9 . . ?

C16 C19 H19 108.9 . . ?

C25 C20 C21 120.3(2) . . ?

C25 C20 N1 119.8(2) . . ?

C21 C20 N1 119.9(2) . . ?

C22 C21 C20 119.6(2) . . ?

C22 C21 H21 120.2 . . ?

C20 C21 H21 120.2 . . ?

C21 C22 C23 120.3(2) . . ?

C21 C22 H22 119.9 . . ?

C23 C22 H22 119.9 . . ?

C22 C23 C24 120.0(2) . . ?

C22 C23 H23 120.0 . . ?

C24 C23 H23 120.0 . . ?

C25 C24 C23 120.0(2) . . ?

C25 C24 H24 120.0 . . ?

C23 C24 H24 120.0 . . ?

C24 C25 C20 119.7(2) . . ?

C24 C25 H25 120.1 . . ?

C20 C25 H25 120.1 . . ?

C14 N1 C15 109.60(19) . . ?

C14 N1 C20 125.43(19) . . ?

C15 N1 C20 124.85(19) . . ?

 

_diffrn_measured_fraction_theta_max    0.990

_diffrn_reflns_theta_full              25.25

_diffrn_measured_fraction_theta_full   0.990

_refine_diff_density_max    0.317

_refine_diff_density_min   -0.282

_refine_diff_density_rms    0.056
